# Supplementary material for: The Correlation between Policy Stringency and Compliance with Restrictions to Reduce the Spread of COVID-19
Source: Preprints.org preprint supplement (doi:10.20944/preprints202312.2081.v1), 2023-12-27
Supplement: Supplementary file 1 [file supplementary]

**Appendix**

| Question ID | Label |
| --- | --- |
| i12 health 01 | Worn a face mask outside your home (e.g. when on public transport, going to a supermarket, going to a main road) |
| i12 health 02 | Washed hands with soap and water |
| i12 health 03 | Used hand sanitiser |
| i12 health 04 | Covered your nose and mouth when sneezing or coughing |
| i12 health 05 | Avoided contact with people who have symptoms or you think may have been exposed to the coronavirus |
| i12 health 06 | Avoided going out in general |
| i12 health 07 | Avoided going to hospital or other healthcare settings |
| i12 health 08 | Avoided taking public transport |
| i12 health 09 | Avoided working outside your home |
| i12 health 10 | Avoided letting your children go to school/ university |
| i12 health 11 | Avoided having guests to your home |
| i12 health 12 | Avoided small social gatherings (not more than 2 people) |
| i12 health 13 | Avoided medium-sized social gatherings (between 3 and 10 people) |
| i12 health 14 | Avoided large-sized social gatherings (more than 10 people) |
| i12 health 15 | Avoided crowded areas |
| i12 health 16 | Avoided going to shops |
| i12 health 17 | Slept in separate bedrooms at home, when normally you would share a bedroom |
| i12 health 18 | Eaten separately at home, when normally you would eat a meal with others |
| i12 health 19 | Cleaned frequently touched surfaces in the home (e.g. doorknobs, toilets, taps) |
| i12 health 20 | Avoided touching objects in public (e.g. elevator buttons or doors) |
| i12 health 21 | Worn a face mask inside your home |
| i12 health 22 | Worn a face mask inside a grocery store / supermarket |
| i12 health 23 | Worn a face mask inside a clothing / footwear shop |
| i12 health 24 | Worn a face mask at your place of work |
| i12 health 25 | Worn a face mask on public transportation |
